# Supplementary material
Source: Springer Nature journal article supplement (https://www.springermedizin.de/resource/supplementary/12911_2009_304_MOESM10_ESM.pdf/9525492)

# Average execution time of different BMI applications

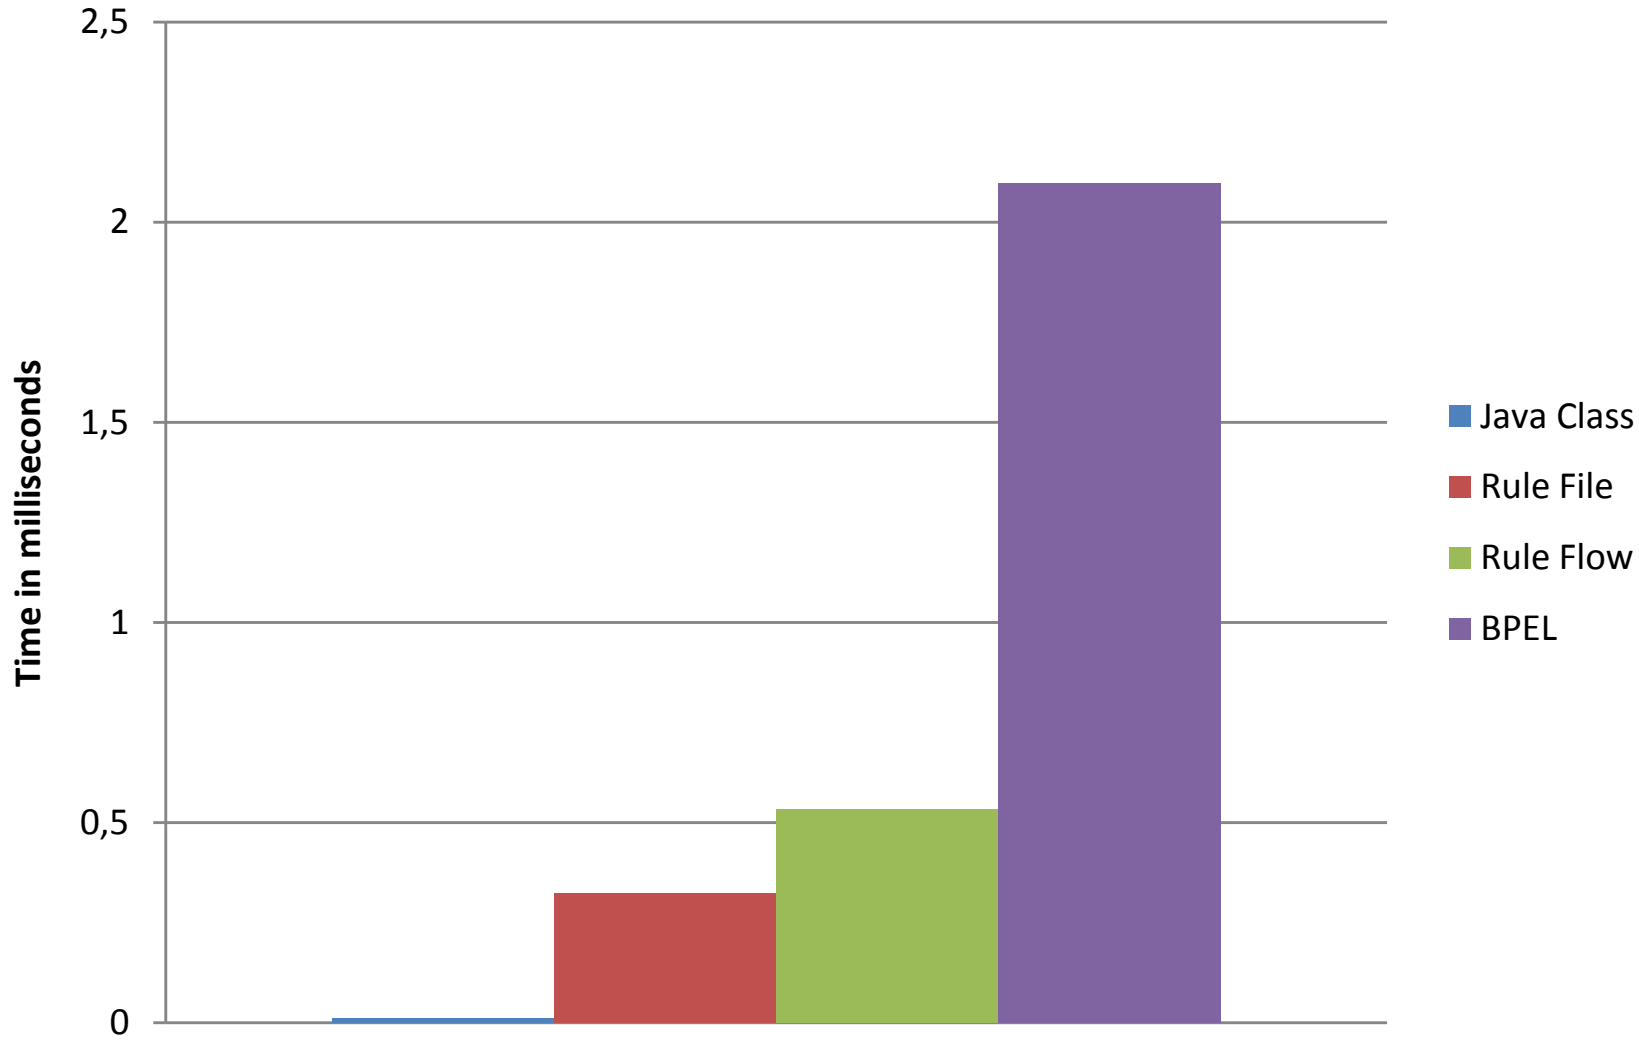

Supplement: MOESM10 [file 9525492]
